# Supplementary material
Source: PubMed Central journal article supplement (PMC5075501)

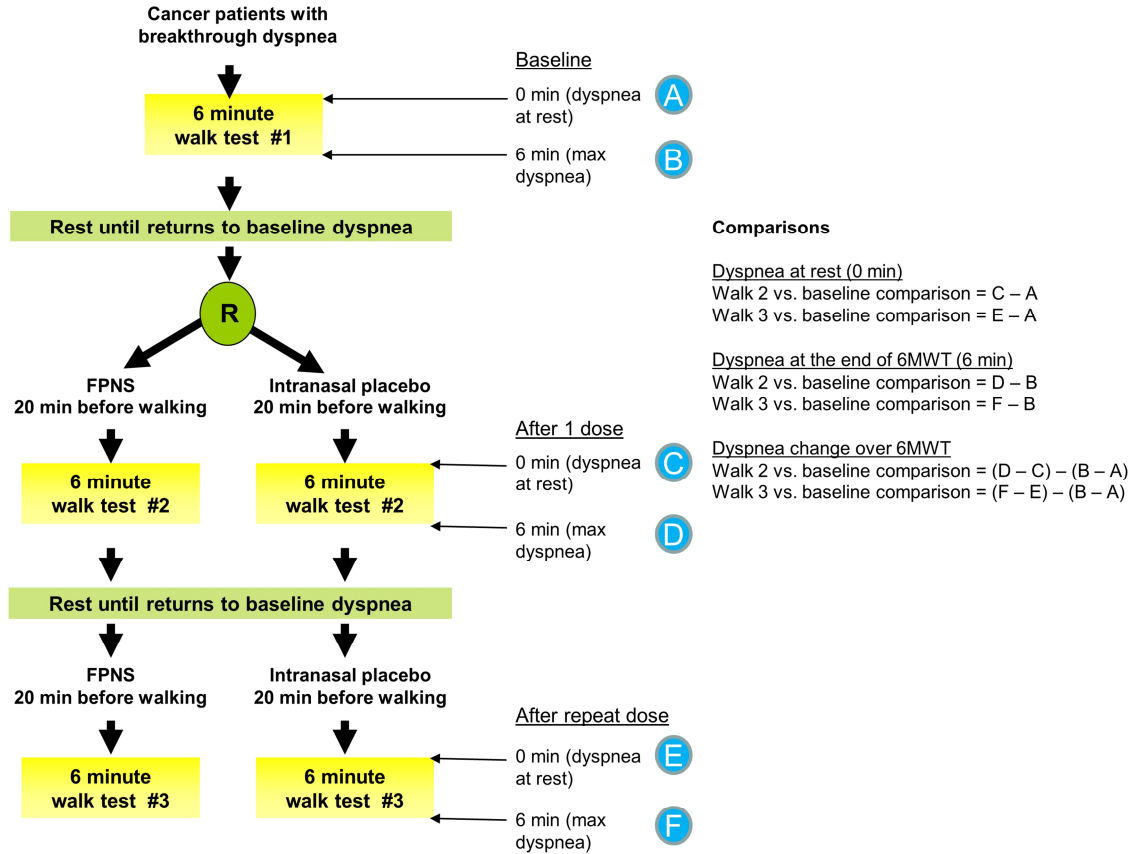

eFigure 1. Study Flow Chart

Supplement: NIHMS810292-supplement-01.pdf [file NIHMS810292-supplement-01.pdf]
